# Supplementary material for: Differences in the intestinal microbiome of healthy children and patients with newly diagnosed Crohn’s disease
Source: PubMed Central journal article supplement (PMC6906406; doi:10.1038/s41598-019-55290-9), 2019-12-11
Supplement: 41598_2019_55290_MOESM1_ESM.pdf [file 41598_2019_55290_MOESM1_ESM.pdf]

## **Differences in the intestinal microbiome of healthy children and patients with newly diagnosed Crohn's disease**

Kinga Kowalska-Duplaga<sup>1</sup>, Tomasz Gosiewski<sup>2</sup>, Przemysław Kapusta<sup>3</sup>, Agnieszka Sroka-Oleksiak<sup>2,4</sup>, Andrzej Wędrychowicz<sup>1</sup>, Stanisław Pieczarkowski<sup>1</sup>, Agnieszka H. Ludwig-Słomczyńska<sup>3</sup>, Paweł P. Wołkow<sup>3</sup>, Krzysztof Fyderek<sup>1</sup>.

<sup>1</sup>Department of Pediatrics, Gastroenterology and Nutrition, Faculty of Medicine, Jagiellonian University Medical College, Kraków, Poland

<sup>2</sup>Division of Molecular Medical Microbiology, Department of Microbiology, Faculty of Medicine, Jagiellonian University Medical College, Kraków, Poland

<sup>3</sup>Center for Medical Genomics – OMICRON, Jagiellonian University Medical College, Kraków, Poland

<sup>4</sup>Division of Mycology, Department of Microbiology, Faculty of Medicine, Jagiellonian University Medical College, Kraków, Poland

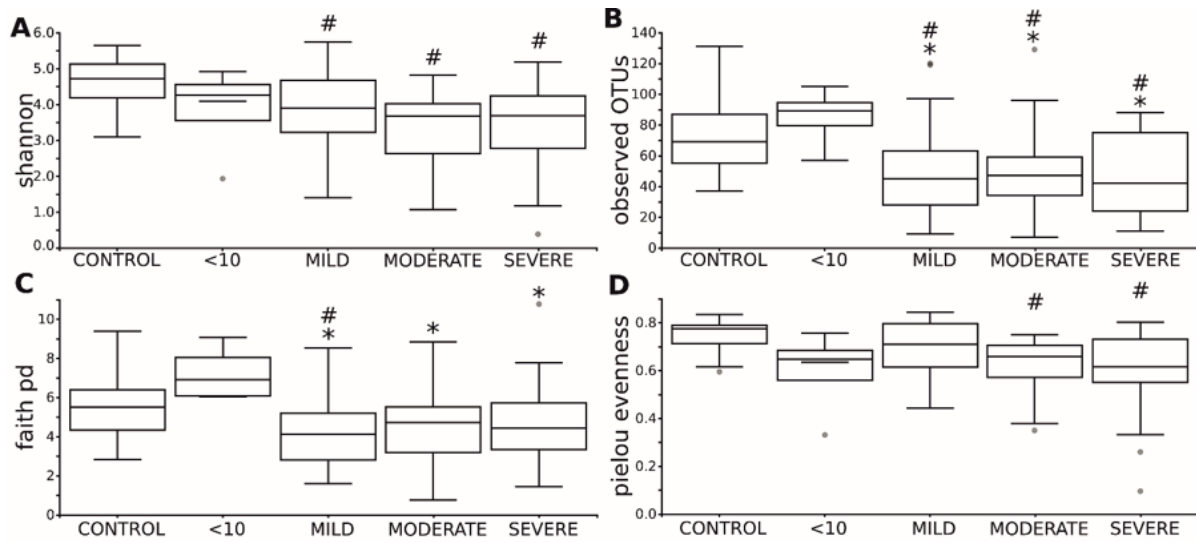

**Supplement 1. Alpha diversity analysis of control and CD patients depending on the PCDAI scale.**

**Figure legend:**

**Supplementary Figure S1 .** Alpha diversity analysis of control and CD patients depending on the PCDAI scale. Within-sample diversity measured by Shannon index (A), observed OTUs (B), Faith's phylogenetic diversity (C) and Pielou's measure of species evenness (D). Kruskal-Wallis with Post-hoc was performed to analyse statistical significance. Statistically significant values between control and other groups were represented as "#". Statistically significant values between PCDAI <10 group and with other groups: mild (10–27.5 points; 21 patients), moderate (>27.5–39 points, 17 patients) and severe (>40 points; 21 patients) CD disease activity (Supplementary Figure S1 online) were represented as "\*".
